# Supplementary material
Source: PubMed Central journal article supplement (PMC9947121)

# **Supplementary materials**

**Plasminogen activator inhibitor 1 is not a major causative factor for exacerbation in a mouse model of SARS-CoV-2 infection**

**Takashin Nakayama , Tatsuhiko Azegami , Maki Kiso, Masaki Imai, Ryuta Uraki, Kaori Hayashi, Akihito Hishikawa, Norifumi Yoshimoto, Ran Nakamichi, Erina Sugita-Nishimura, Eriko Yoshida-Hama, Yoshihiro Kawaoka & Hiroshi Itoh**

**Supplementary Figure S1. Effects of PAI-1 vaccine on hemostatic parameters.** Mice (n = 3 per group) were immunized with the PAI-1 vaccine or KLH vehicle. (a, b) Plasma samples were obtained at 13 weeks of age, and activated partial thromboplastin time (APTT) and prothrombin time (PT) were measured. (c, d) Tail-bleeding assay was performed at 16 weeks of age. Data are expressed as mean  $\pm$  SEM (error bars). Significant differences in each parameter between the vaccine and vehicle groups were determined by using Student's *t*-test.

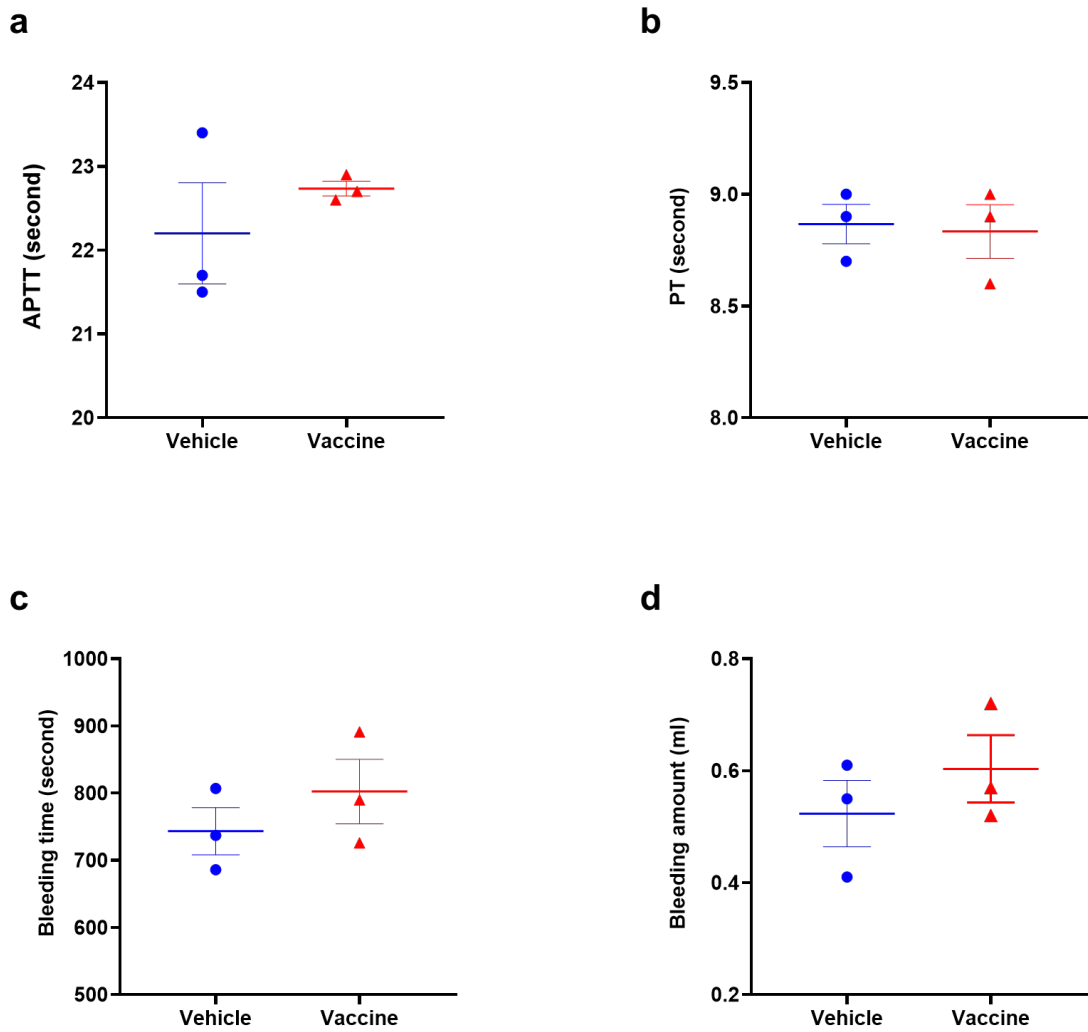

Supplement: 41598_2023_30305_MOESM1_ESM.pdf [file 41598_2023_30305_MOESM1_ESM.pdf]
