# Supplementary material
Source: PubMed Central journal article supplement (PMC9947121)
Supplement: 41598_2023_30305_MOESM2_ESM.pdf [file 41598_2023_30305_MOESM2_ESM.pdf]

**Vehicle serum**

**Vaccine serum**

**50kDa**  
**40kDa**  
**30kDa**

**50kDa**  
**40kDa**  
**30kDa**

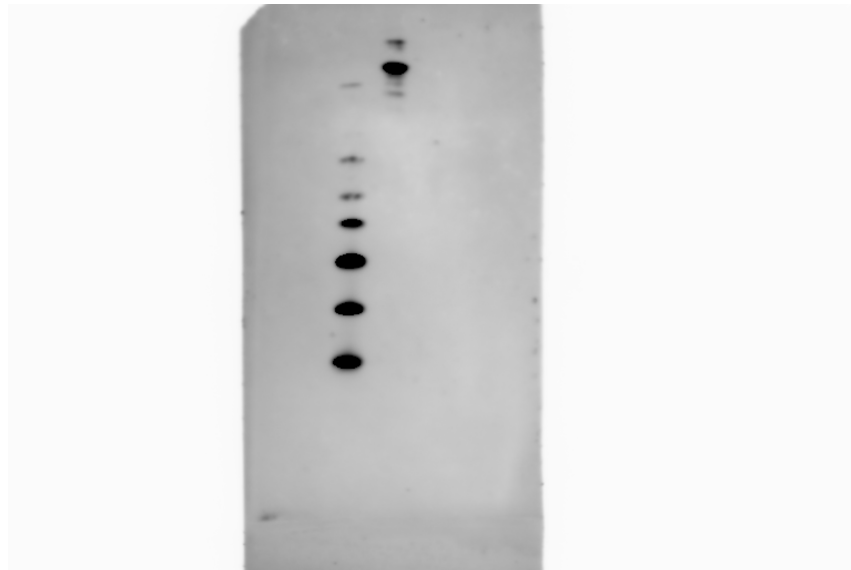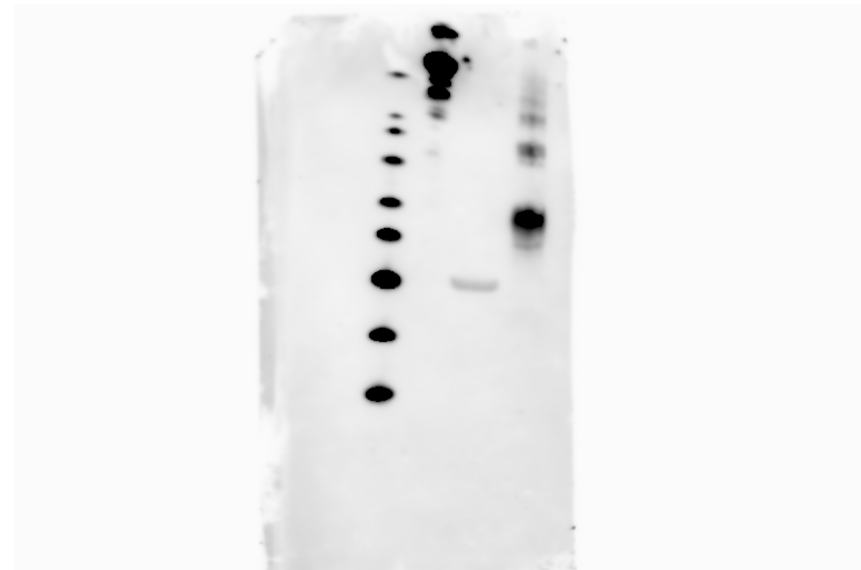

**1 2 3 4**

**1 2 3 4**

**1: Marker, 2: KLH, 3: recombinant PAI-1 whole protein, 4: PAI-1(366-372)-BSA**
